# Supplementary material
Source: PubMed Central journal article supplement (PMC3419889)
Supplement: hesr0047-0783-SD3.pdf [file hesr0047-0783-SD3.pdf]

**Health Services Research**  
**COPYRIGHT ASSIGNMENT FORM**

This Agreement is made with The Health Research and Educational Trust for the Article ("Article") submitted by you ("Author") for publication in *Health Services Research* ("the Journal") published by Blackwell Publishing, Inc. on behalf of The Health Research and Educational Trust.

To enable Blackwell Publishing to publish the Article in the Journal, the ownership of copyright must be established. Please read and complete the form below (Section A plus Section B or C, as appropriate) and return one copy to the address given below. There are explanatory notes to this Agreement, which also form part of the Agreement.

**The Article cannot be published until this signed Agreement is received by the Journal.**

**SECTION A: Author's Warranty** (Please PRINT your details)

Name: Nancy L. Keating

Address: Health Care Policy, HMS  
180 Longwood Avenue, Boston, MA, 02115

HSR Manuscript ID: HSR-10-0544.R1

Article title (or provisional Article title): Location of Cancer Surgery for  
Older Veterans with Cancer

Names of all authors in the order in which they appear in the Article: EM Kouri, MB Landrum,  
EB Lamont, S Bozeman, BJ McNeil, NL Keating

Please check any that apply:

- I am or was a U.S. government employee, and the article is made in that capacity (please see Note 10).
- I am or was a U.K., Canadian, or Australian government employee, and the article is made in that capacity (please see Note 10).

In consideration of the publication of the Article in the above Journal, I hereby warrant and undertake:

- a. that this Article is an original work, has not been published before, and is not being considered for publication elsewhere in its final form either in printed or electronic form.
- b. that I have obtained permission from the copyright holder to reproduce in the Article (in all media including print and electronic form) material not owned by me, and that I have acknowledged the source;
- c. that this Article contains no violation of any existing copyright or other third party right or any material of an obscene, indecent, libelous, or otherwise unlawful nature, and that to the best of my knowledge this Article does not infringe the rights of others;
- d. that I will indemnify and keep indemnified the Editors, The Health Research and Educational Trust, and Blackwell Publishing against all claims and expenses (including legal costs and expenses) arising from any breach of this warranty and the other warranties on my behalf in this Agreement;
- e. that in the case of a multi-authored Article I have obtained copyright assignment from all co-authors, in writing, a copy of which is attached, to enter into this Agreement on their behalf and to bind them to it, and that all co-authors have read and agreed the above warranties;

**SECTION B: Copyright Assignment**

In consideration of the publication of the Article in the Journal, I hereby assign to The Health Research and Educational Trust copyright for the full period of copyright and all renewals, extensions, revisions and revivals together with all accrued rights of action throughout the world in any form and in any language (including all media, both now known or later developed). The Health Research and Educational Trust may assign its rights under this Agreement.

Notwithstanding the above, I retain all proprietary rights other than copyright, such as patent and trade mark rights and rights to any process or procedure described in the Article.

Full detail regarding the assignment of copyright, the management of permissions, and what rights are granted back to the authors can be found on the accompanying Notes, which you agree are fully incorporated into, and form part of, this Agreement.

AGREED:

Author: Signed: 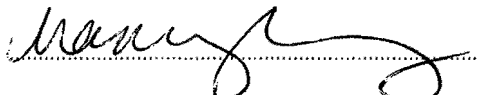 Date: 7/29/11

In signing this form, the signor warrants that any authors not signing have granted the signor the power of attorney to do so on their behalf, and that the manuscript submitted has been approved by these authors in the form in which it has been submitted, and that the warranties given above have been read and agreed by all authors.

---

**SECTION C: If copyright in the Article is owned by someone other than the Author**

I hereby grant The Health Research and Educational Trust non-exclusive rights to reproduce and/or distribute this Article (in full or in part) and to publish the same throughout the world in any format and in all languages including without limitation in printed, electronic or other medium on optical disk, transmission over the internet and other communication networks and in any other electronic form, and to authorize others (including reproduction rights organizations such as the Copyright Clearance Center and the Copyright Licensing Agency) to do the same. The Health Research and Educational Trust may assign its rights under this Agreement.

Title of copyright holder: .....

This will be printed on the copyright line on each page of the Article. It is the Author's responsibility to provide the correct information of the copyright holder.

Signed on behalf of copyright holder: ..... Date: .....

Title/position/address: .....

In signing this form, the signor warrants that the manuscript submitted has been approved by all authors in the form in which it has been submitted, and that the warranties given above have been read and agreed by all authors.

**Data Protection**

The Publisher may store your name and contact details in electronic format in order to correspond with you about the publication of your article in the journal. We would like to contact you from time to time with information about new Blackwell publications and services in your subject area. (For European contributors, this may involve transfer of your personal data outside the European Economic Area). If you do not wish to be contacted in this way, please check this box:

Author

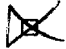

**PLEASE RETURN A SIGNED COPY OF THIS FORM TO:**

Meighan Schreiber, M.S.S.A., Managing Editor  
Health Research & Educational Trust (HRET)  
American Hospital Association (AHA)  
155 N. Wacker Dr., Suite 400  
Chicago, IL 60606

**4.A. Author matrix.** Please complete the authorship matrix affirming which roles each author has fulfilled. To be listed as an author, persons should have made contributions in both of the shaded areas; all others should be acknowledged as contributors. In the box in 4.B., we invite you to name other contributors. In addition, you may use the box in 4.B. if you wish to name other kinds of contributions by authors.

Section 4 A. and B. will be made available in the electronic version of accepted manuscripts.

\*You may wish to copy the author's names from the box on page 2.

| Manuscript Number: HSR-10-0544.R1 | Each author must check at least one blue box showing important contributions to: |                                                  |                                     | & check contributions in at least one orange box: |                                                      |
|-----------------------------------|----------------------------------------------------------------------------------|--------------------------------------------------|-------------------------------------|---------------------------------------------------|------------------------------------------------------|
|                                   | Conception and design                                                            | Acquisition of data (arranging for or obtaining) | Analysis and interpretation of data | Drafting the manuscript                           | Critical revision for important intellectual content |
| Name of Each Author*              |                                                                                  |                                                  |                                     |                                                   |                                                      |
| Elena M. Kouri, PhD               | <input type="checkbox"/>                                                         | <input type="checkbox"/>                         | <input checked="" type="checkbox"/> | <input checked="" type="checkbox"/>               | <input checked="" type="checkbox"/>                  |
| Mary Beth Landrum, PhD            | <input checked="" type="checkbox"/>                                              | <input checked="" type="checkbox"/>              | <input checked="" type="checkbox"/> | <input checked="" type="checkbox"/>               | <input checked="" type="checkbox"/>                  |
| Elizabeth B.Lamont, MD, MS        | <input type="checkbox"/>                                                         | <input checked="" type="checkbox"/>              | <input checked="" type="checkbox"/> | <input type="checkbox"/>                          | <input checked="" type="checkbox"/>                  |
| Sam Bozeman, MPH                  | <input type="checkbox"/>                                                         | <input checked="" type="checkbox"/>              | <input checked="" type="checkbox"/> | <input type="checkbox"/>                          | <input checked="" type="checkbox"/>                  |
| Barbara J. McNeil, MD, PhD        | <input checked="" type="checkbox"/>                                              | <input checked="" type="checkbox"/>              | <input checked="" type="checkbox"/> | <input type="checkbox"/>                          | <input checked="" type="checkbox"/>                  |
| Nancy L. Keating, MD, MPH         | <input checked="" type="checkbox"/>                                              | <input checked="" type="checkbox"/>              | <input checked="" type="checkbox"/> | <input checked="" type="checkbox"/>               | <input checked="" type="checkbox"/>                  |
|                                   | <input type="checkbox"/>                                                         | <input type="checkbox"/>                         | <input type="checkbox"/>            | <input type="checkbox"/>                          | <input type="checkbox"/>                             |
|                                   | <input type="checkbox"/>                                                         | <input type="checkbox"/>                         | <input type="checkbox"/>            | <input type="checkbox"/>                          | <input type="checkbox"/>                             |
|                                   | <input type="checkbox"/>                                                         | <input type="checkbox"/>                         | <input type="checkbox"/>            | <input type="checkbox"/>                          | <input type="checkbox"/>                             |
|                                   | <input type="checkbox"/>                                                         | <input type="checkbox"/>                         | <input type="checkbox"/>            | <input type="checkbox"/>                          | <input type="checkbox"/>                             |
|                                   | <input type="checkbox"/>                                                         | <input type="checkbox"/>                         | <input type="checkbox"/>            | <input type="checkbox"/>                          | <input type="checkbox"/>                             |
|                                   | <input type="checkbox"/>                                                         | <input type="checkbox"/>                         | <input type="checkbox"/>            | <input type="checkbox"/>                          | <input type="checkbox"/>                             |
|                                   | <input type="checkbox"/>                                                         | <input type="checkbox"/>                         | <input type="checkbox"/>            | <input type="checkbox"/>                          | <input type="checkbox"/>                             |
|                                   | <input type="checkbox"/>                                                         | <input type="checkbox"/>                         | <input type="checkbox"/>            | <input type="checkbox"/>                          | <input type="checkbox"/>                             |

#### Section 4.B. Other Contributions

Some research projects involve very extensive teams with many people who do not meet the criteria for authorship but who have contributed importantly to the work. The box below is designed to acknowledge other types of contributions. As appropriate, use this box to name other people who have made important contributions to the work reported in this manuscript. Please also name people who have played a significant role in preparing the manuscript but who are not listed as authors. NOTE: If you wish to acknowledge any of these contributors in print, please include their names and roles in the joint acknowledgment section below.

Please name contributors to be acknowledged for:

Statistical analysis:

Data collection (under supervision) Raye Anne Dorn

Interviewing (under supervision)

Programming and data management: David Izrael, Jeffrey Souza, Stephanie Segers, Larry Hughes, John Quinn, Elizabeth Axelrod

Editing for presentation or style

Obtaining funding

Administrative, technical, or material support: Garrett Kirk, Marshall Amesquita, Barbara Stephens, Stanlie Daniels, Heidi Martin, Diana Ordin, Patricia Vandenberg

Supervision of research staff

Other: (specify: Clinical Oncology Feedback ) Albert Muhleman, Nirmala Bhoopalam, Paulette Mehta, Dawn Provenzale, Michael Kelley, Robert Kerns

**INSTRUCTIONS: THE CORRESPONDING AUTHOR MUST FILL OUT SECTION 5.**

**5. Joint Acknowledgment/Disclosure Statement.** Please enter a 1-3 sentence statement that acknowledges all forms of financial and material support for the project, the roles of key individuals who should be recognized; (this may or may not extend to everyone listed as contributors). Please also include summary statements about what you feel are the conflicts of interests and disclosures without which some readers may feel that important relevant information is being withheld. The editors will determine whether these disclosures are sufficient or excessive and may return a revised version. All authors will need to approve the final version. As appropriate, please add at the end of your statement: 'Disclosures: None' or 'No Other Disclosures'.

Section 5 will be made available in both the electronic and print version of accepted manuscripts.

Joint Acknowledgement/Disclosure Statement: None of the authors have any disclosures.

**The corresponding** author should obtain permission to name all individuals named in an Acknowledgment or the Contributorship Section because readers may infer their endorsement of data and conclusions.

**The corresponding author must check the box below to affirm his/her certification that:**

- all persons who have made substantial contributions to the work reported in this manuscript (e.g., data collection, analysis, or writing or editing assistance) but who do not fulfill the authorship criteria are named with their specific contributions in the

Contributorship Box associated with the manuscript.

- all persons named in the Contributorship box have provided me with permission to be named.
- no other persons have made substantial contributions to this manuscript.
- all authors have approved the Joint Acknowledgement/Disclosure Statement intended for publication and the author matrix.

I, the corresponding author, certify that the above statements are true.

A handwritten signature in black ink, appearing to read 'Changye', written in a cursive style.

(Adapted, with permission, from the Journal of the American Medical Association, 2006)
